# Supplementary material for: N-doped TiO2/C nanocomposites and N-doped TiO2 synthesised at different thermal treatment temperatures with the same hydrothermal precursor
Source: Royal Society of Chemistry journal article supplement (doi:10.1039/c4dt00924j), 2014-01-01
Supplement: c4dt00924j1.pdf [file c4dt00924j1.pdf]

## Supporting Information

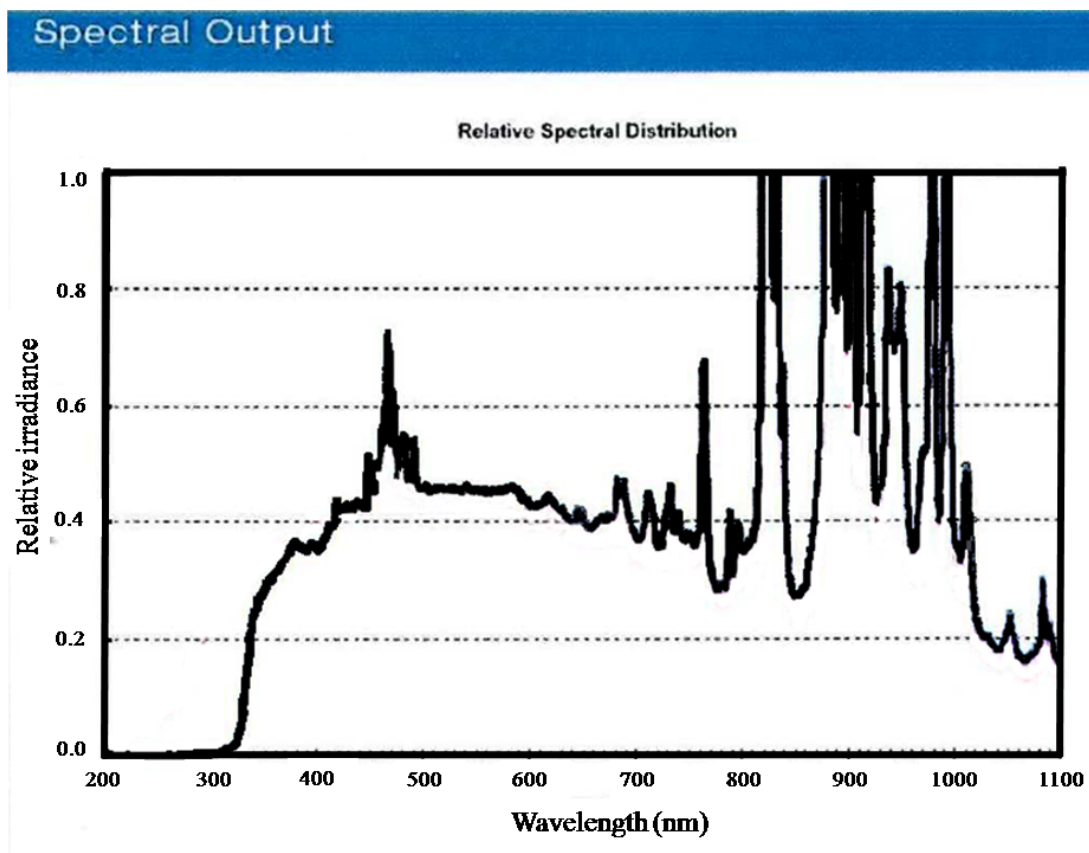

Fig. S1 Xenon lamp spectral line (wavelength-relative light radiant energy)

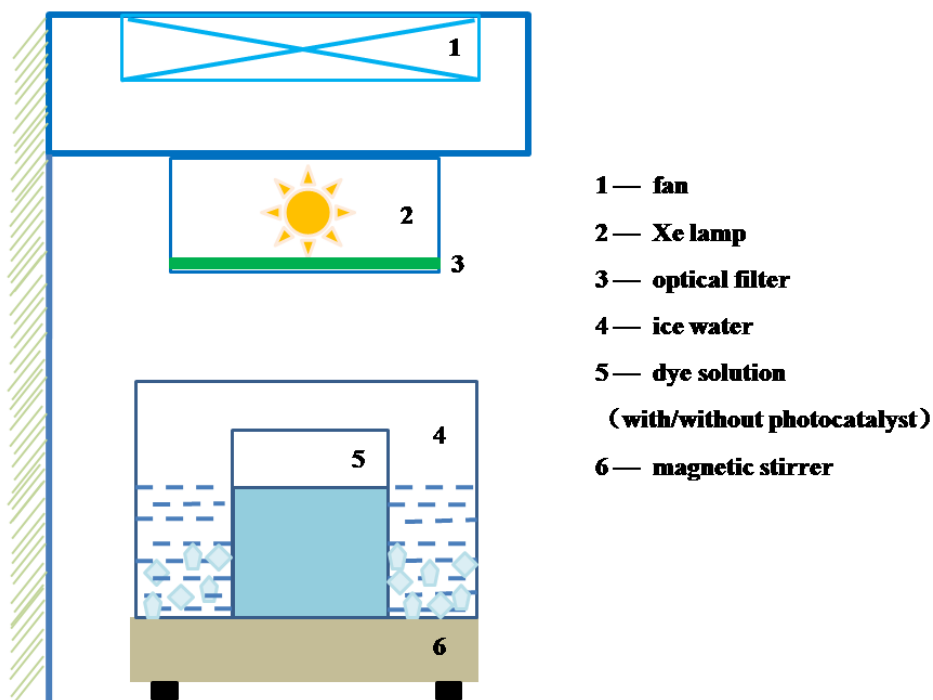

Fig. S2 The schematic drawing for photocatalytic reaction apparatus

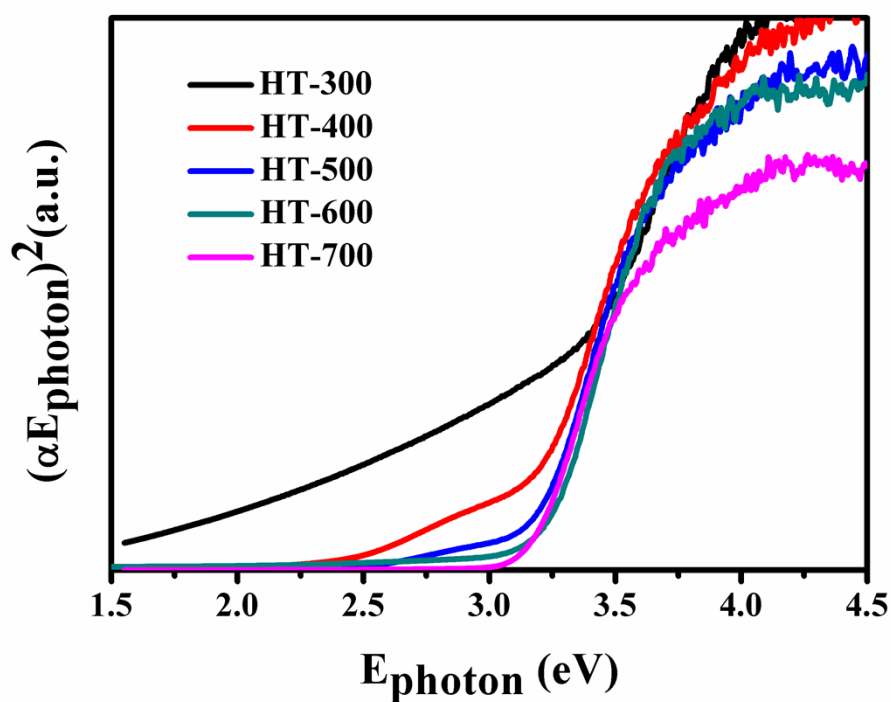

**Fig. S3** The energy gap calculated from reflectance spectra

As titania is an indirect semiconductor, the plots of  $(\alpha E_{\text{photon}})^2$  versus the energy of the absorbed light give the band gap of the HT samples. The band gap calculated from the reflectance spectra was concluded in Fig. S3. The HT-300 (N-TiO<sub>2</sub>/C) contains carbon and is less crystalline, therefore, the calculated  $E_g$  is more suitable to apply to other HT samples. The band gaps of HT-400, HT-500, HT-600 and HT-700 are estimated to be 2.37eV, 2.51eV, 3.17eV and 3.18eV, respectively. With the increase in thermal treatment temperature, the energy gap of HT sample increases accordingly.

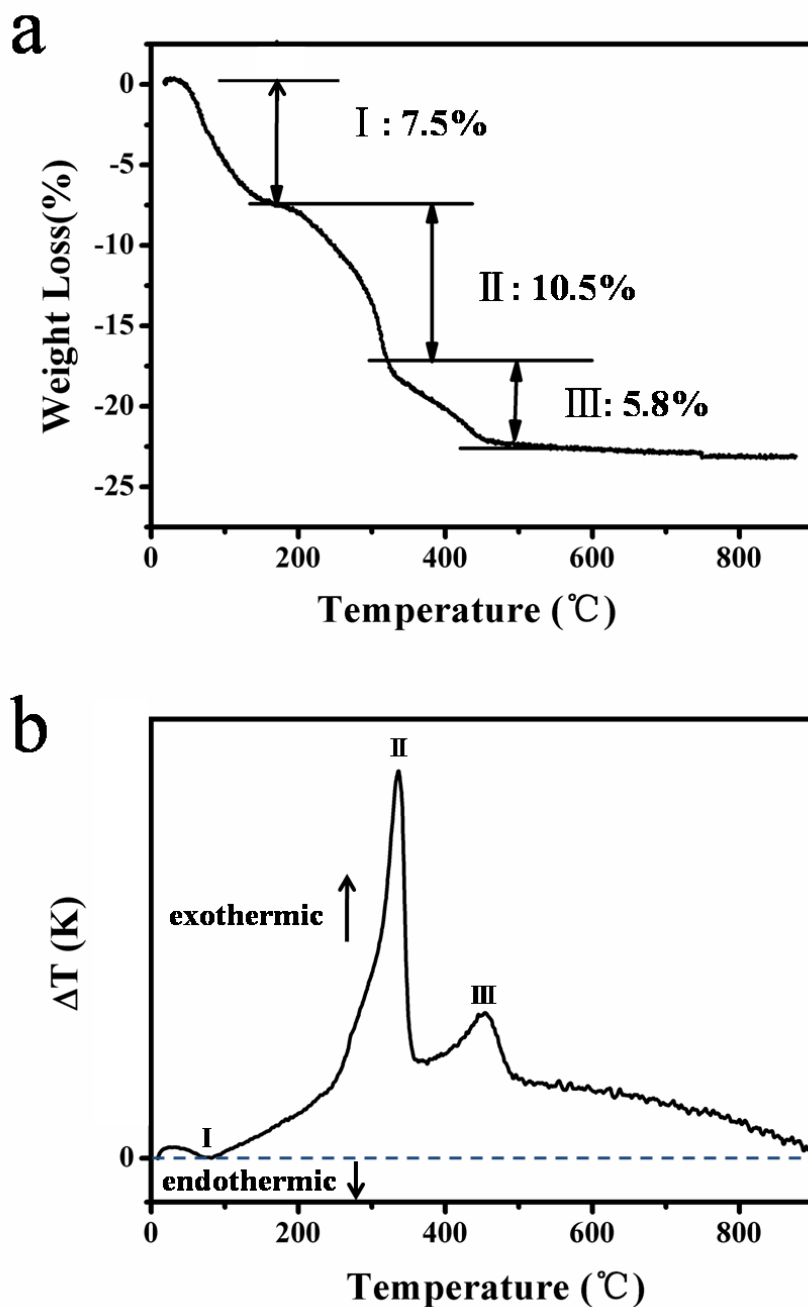

**Fig. S4** Thermo-gravimetric analysis (TGA) and differential thermal analysis (DTA) pattern of N-TiO<sub>2</sub>/C nanocomposites under a stream of air

The TGA curve exhibits a total mass loss of 23.8% for the sample. The curve can be divided into three stages. Below 200°C, a mass loss of up to 7.5% is observed, which is caused by dehydration from the powders. And the DTA curve shows that this is an endothermic process. The second stage is from 200 to 300°C, where the mass loss is about 10.5 %. This can be assigned to the carbonization of residual reactant, TMAOH, which leads to the formation of carbon species and doped nitrogen in the N-TiO<sub>2</sub>/C. The third stage is from 300 to 500°C. During this stage, the weight loss is about 5.8%, which can be assigned to combustion of carbon species in the N-TiO<sub>2</sub>/C. Therefore, N-TiO<sub>2</sub> was obtained at 500°C. The last two stage are exothermic, as can be concluded from the DTA curve.

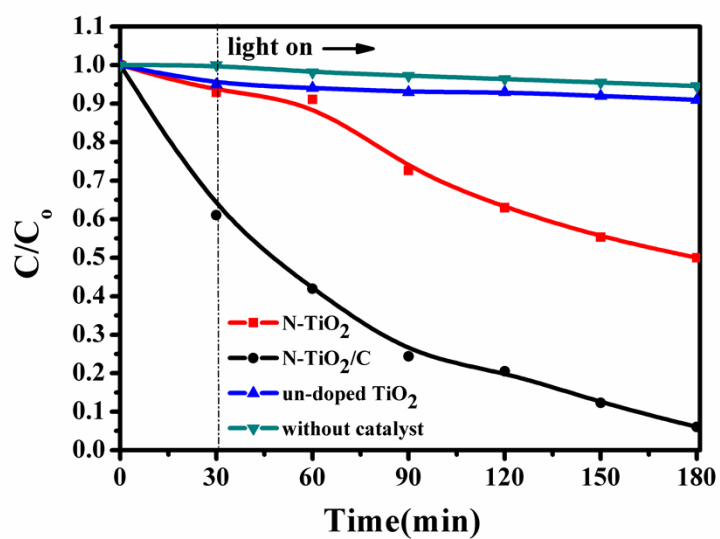

**Fig. S5** The photodegradation of acid fuchsin with N-TiO<sub>2</sub>/C, N-TiO<sub>2</sub> and un-doped TiO<sub>2</sub> under visible light

Besides MB, acid fuchsin was also applied as the pollutant to testify the photocatalytic activity of N-TiO<sub>2</sub>/C and N-TiO<sub>2</sub> under visible light. The photodegradation of acid fuchsin was the same with the photodegradation of MB. 20mg photocatalyst were added to 100mL 10mg/L dye solution. Fig. S5 displays the result.
